# Supplementary material for: The Overlooked Photochemistry of Iodine in Aqueous Suspensions of Fullerene Derivatives
Source: PubMed Central journal article supplement (PMC9134498; doi:10.1021/acsnano.2c02281), 2022-05-09
Supplement: nn2c02281_si_001.pdf [file nn2c02281_si_001.pdf]

## Supporting Information

**Title:** The overlooked photochemistry of iodine in aqueous suspensions of fullerene derivatives

**Authors:** Madhusudan Kamat<sup>1</sup>, Kyle Moor<sup>2,3</sup>, Gabrielle Langlois<sup>1</sup>, Moshan Chen<sup>4</sup>, Kimberly M. Parker<sup>4</sup>, Kristopher McNeill<sup>2</sup>, Samuel D. Snow<sup>1\*</sup>

<sup>1</sup>Department of Civil and Environmental Engineering, Louisiana State University, 3255 Patrick Taylor Hall, Baton Rouge, Louisiana 70803, United States.

<sup>2</sup>Department of Civil and Environmental Engineering, Utah State University, 4110 Old Main Hill, Logan UT 84322-4110, United States.

<sup>3</sup>Department of Environmental Systems Science, ETH Zurich, Universitaetstrasse 16, 8092 Zurich, Switzerland.

<sup>4</sup>Department of Energy, Environmental, & Chemical Engineering, Washington University in St. Louis, 1 Brookings Drive, St. Louis, MO 63130-4899, United States.

\*Corresponding author: [ssnow@lsu.edu](mailto:ssnow@lsu.edu);

**Contents**

**Number of pages: 7**

**Figures: 8**

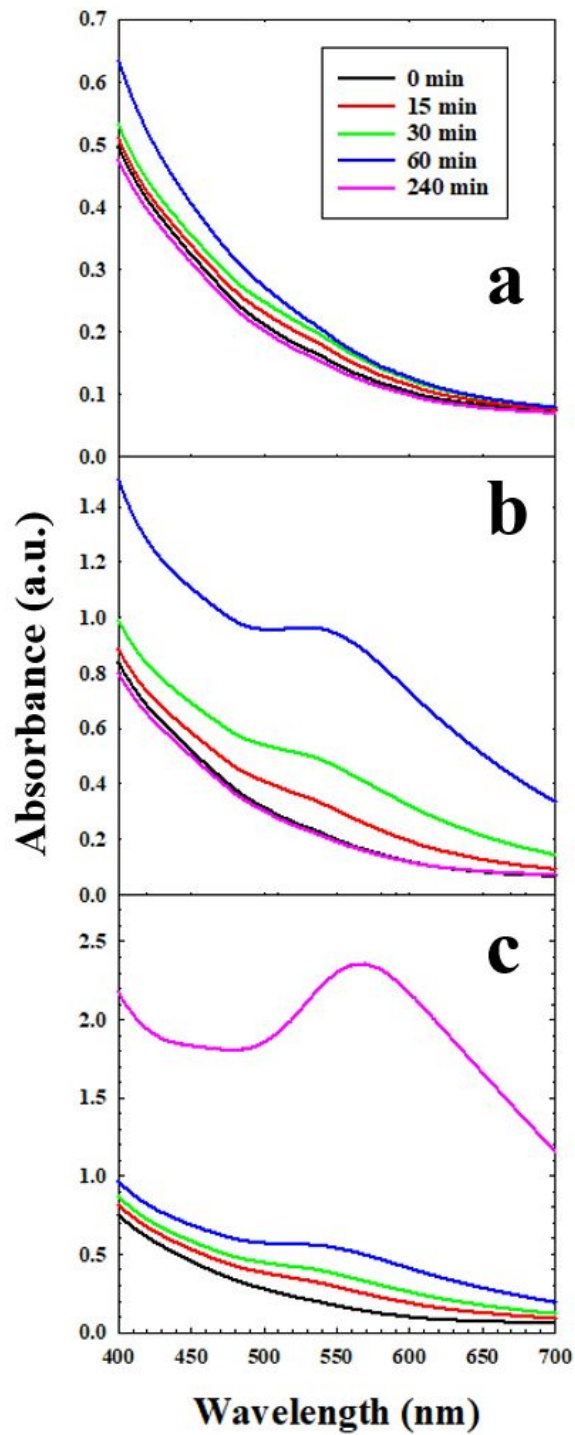

**Figure S1.** UV-Vis spectra of **a)** I<sub>2</sub> formation from irradiation of 50 μM nC<sub>60</sub>-FP-I by UV<sub>395</sub> in the presence of 10 mM starch; **b)** 100 μM nC<sub>60</sub>-FP-I over 4 h; **c)** for 100 μM nC<sub>60</sub>-FP-SO<sub>4</sub> in the presence of 75 μM NaI and 10 mM starch under UV<sub>395</sub> irradiation over 4 h.

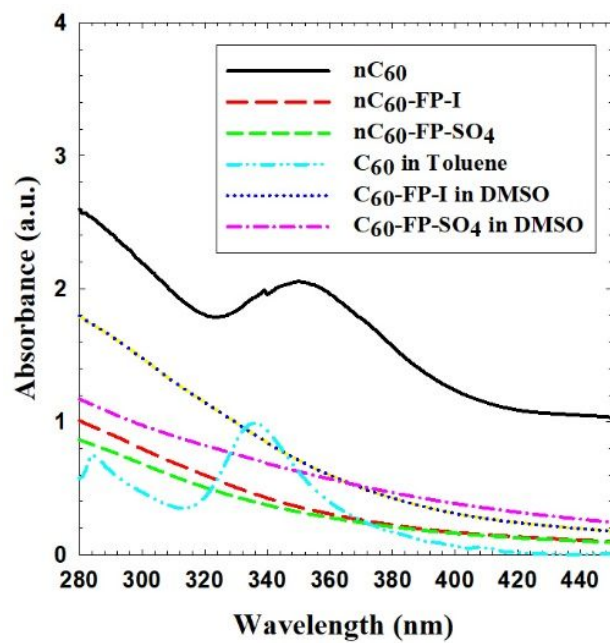

**Figure S2.** UV-Vis spectrum for 25  $\mu\text{M}$  fullerenes dispersed in organic solvents or as aggregates in water.

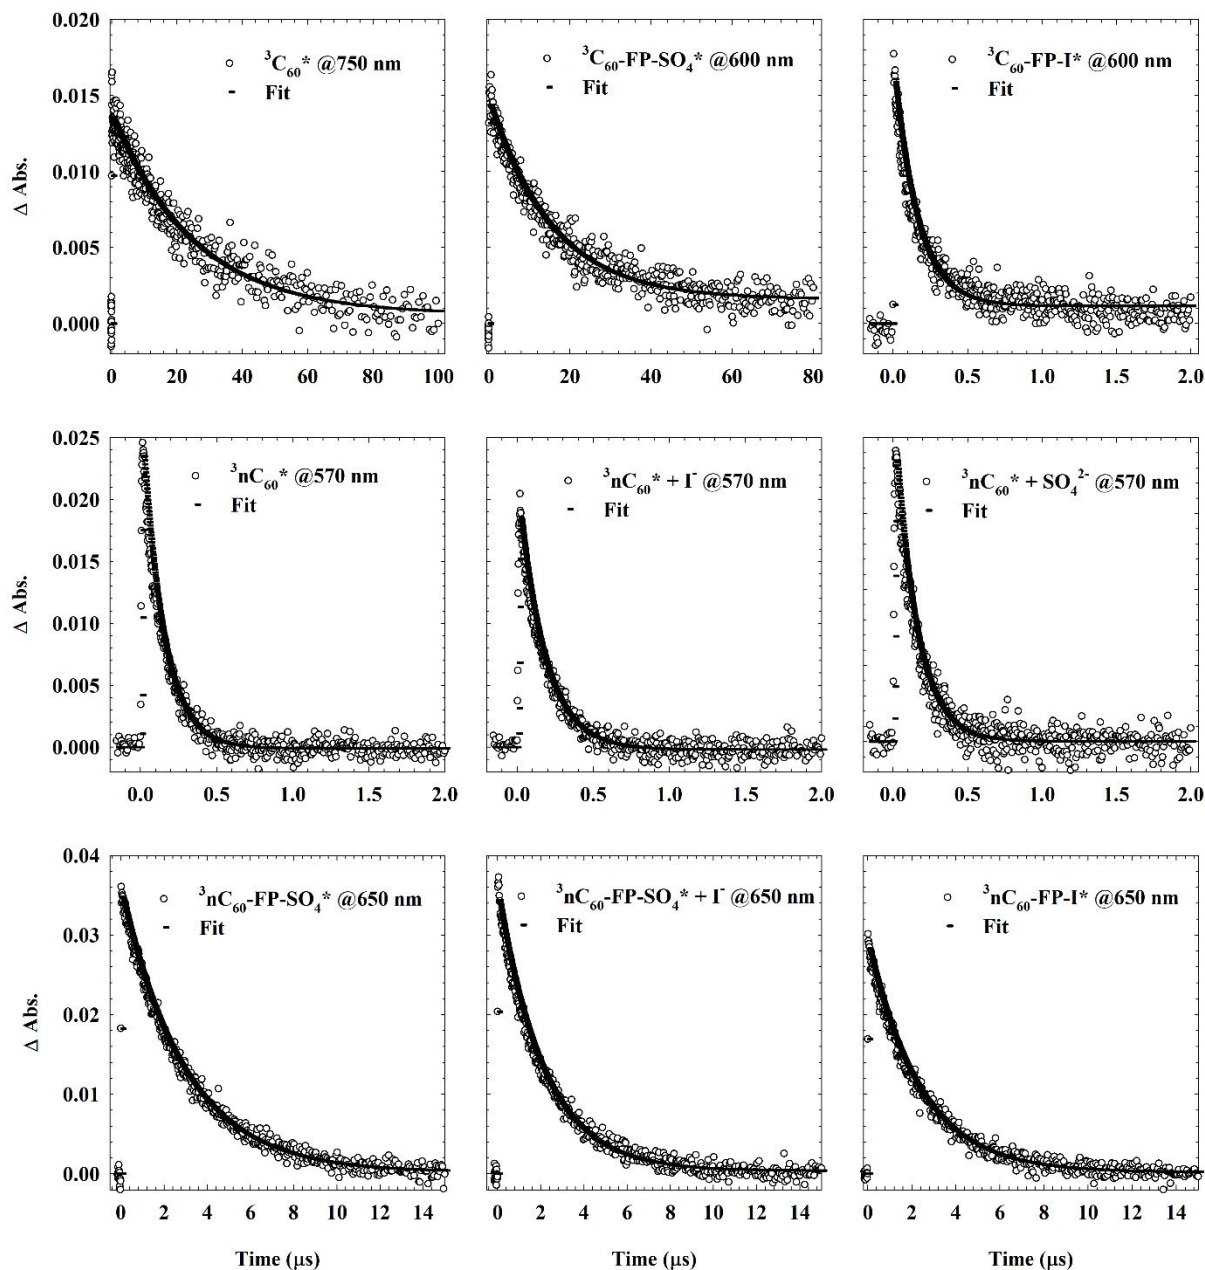

**Figure S3.** Transient absorption decay profiles and corresponding curve fits for  $C_{60}$  in toluene,  $C_{60}$ -FP- derivatives in DMSO, and aqueous aggregates of each with added cosolutes as shown. KI was added in excess to provide the added  $I^-$ , at 4.76 mM. Absorbances were measured at optimal transient absorption wavelengths: 750 nm for  $C_{60}$  in toluene, 600 nm for the  $C_{60}$  derivatives in DMSO, 570 nm for aqueous  $nC_{60}$ , and 650 for aqueous  $C_{60}$  derivatives

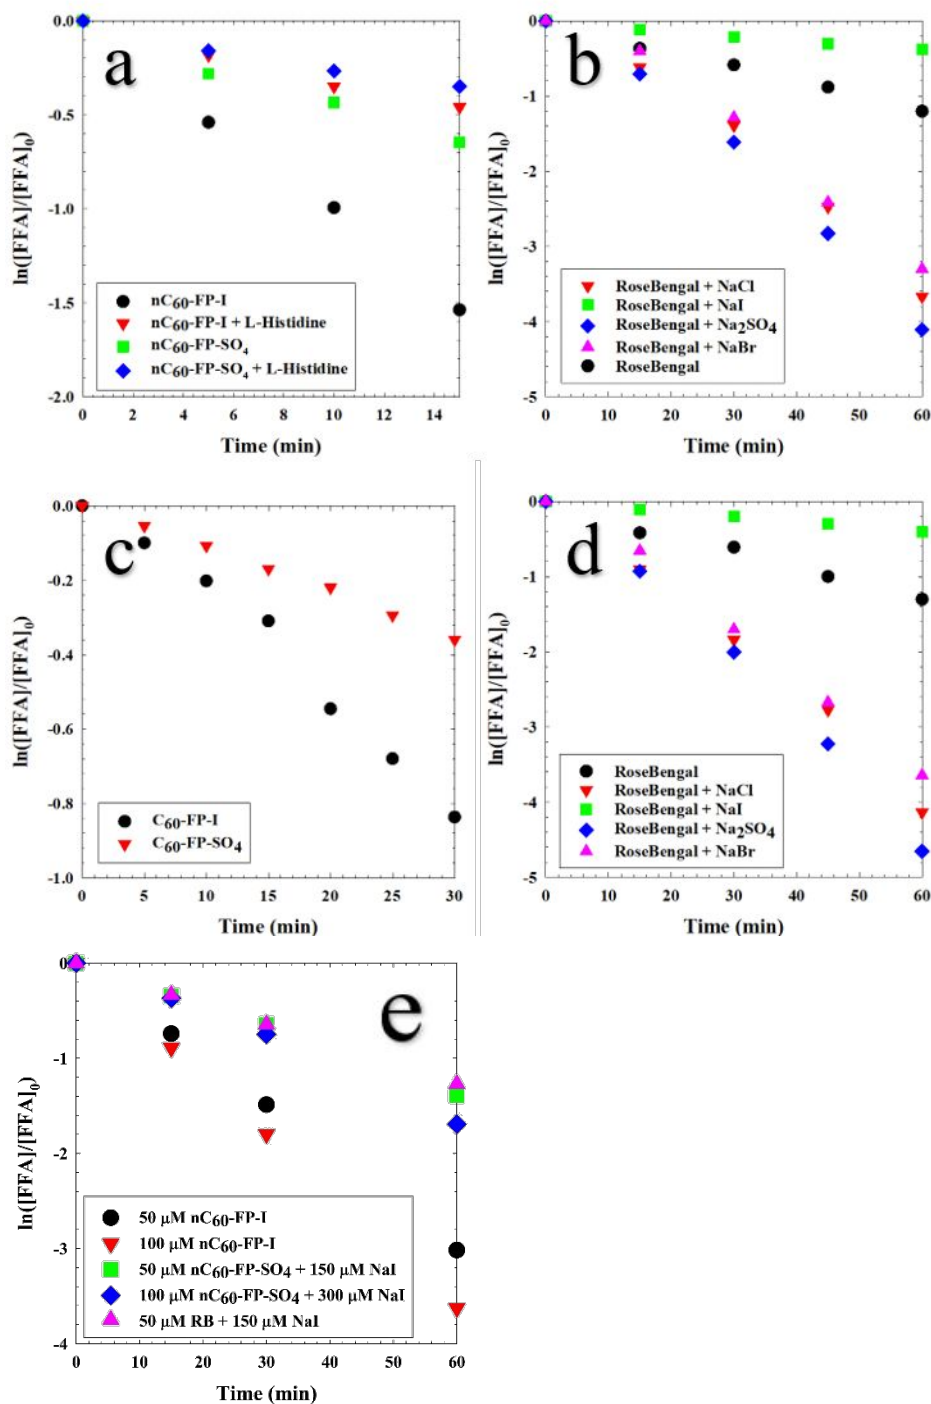

**Figure S4.** Photodegradation of 0.2 mM FFA under several conditions: a) in the presence of 5  $\mu\text{M}$  of  $n\text{C}_{60}\text{-FP-I}$  or  $n\text{C}_{60}\text{-FP-SO}_4$  sensitized by  $\text{UV}_{395}$  in water; b) under  $\text{UV}_{395}$  in the presence of 50  $\mu\text{M}$  RB and 15 mM of various anions; c) in the presence of 5.0  $\mu\text{M}$   $\text{C}_{60}\text{-FP-I}$  or  $\text{C}_{60}\text{-FP-SO}_4$  in DMSO; d) in the presence of 50  $\mu\text{M}$  Rose Bengal and 15 mM of halide or sulfate salts under  $\text{UV}_{395}$  in DMSO; e) under  $\text{UV}_{395}$  in the presence of  $n\text{C}_{60}\text{-FP-I}$  or  $n\text{C}_{60}\text{-FP-SO}_4$  and halide salts.

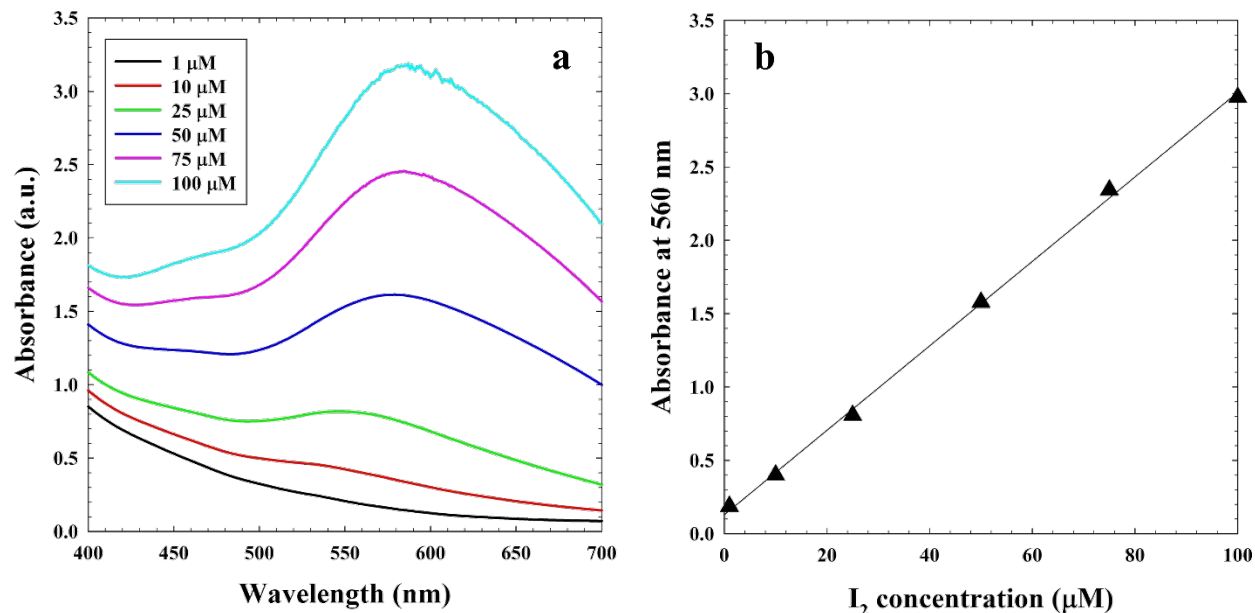

**Figure S5.** (a) UV-Vis spectrum for 50 μM C<sub>60</sub>-FP-I and 10 mM starch with variable concentration of I<sub>2</sub>, and (b) corresponding dose-response curve for the absorbance at 560 nm of the I<sub>2</sub>-starch complex observed in the presence of 50 μM C<sub>60</sub>-FP-I.

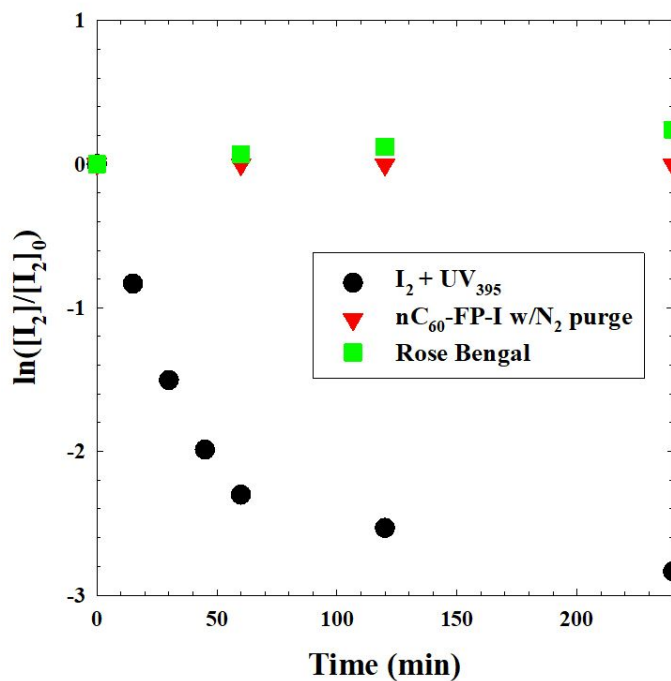

**Figure S6.** Photodecomposition of 300 μM I<sub>2</sub> under UV<sub>395</sub> irradiation over 4 hours and I<sub>2</sub> production by 50 μM nC<sub>60</sub>-FP-I in a N<sub>2</sub>-purged solution, 75 μM NaI and 25 μM RB with no purge, measured with 10 mM starch.

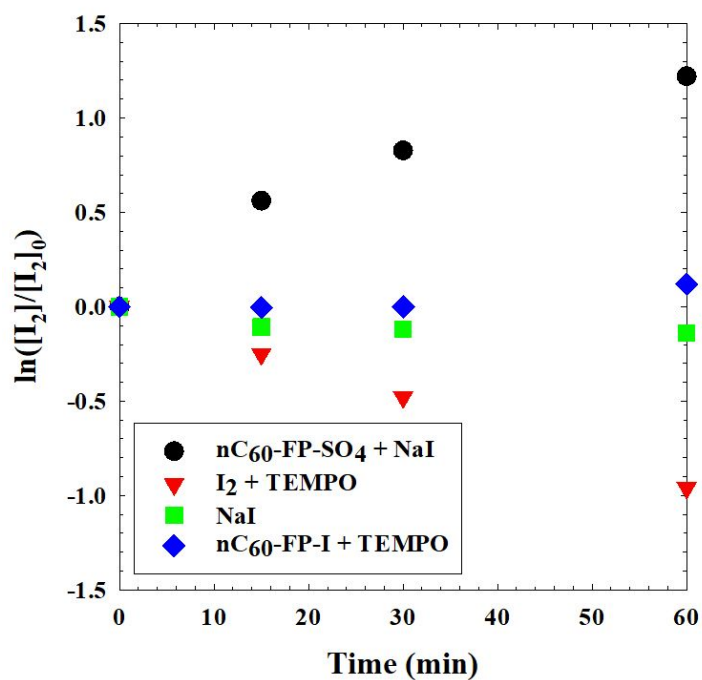

**Figure S7.** Formation or destruction of I<sub>2</sub> under UV<sub>395</sub> with 100 μM C<sub>60</sub>-FP-SO<sub>4</sub> with 75 μM NaI; 100 μM nC<sub>60</sub>-FP-I with 100 μM TEMPO; 300 μM I<sub>2</sub> with 100 μM TEMPO; or 75 μM NaI.

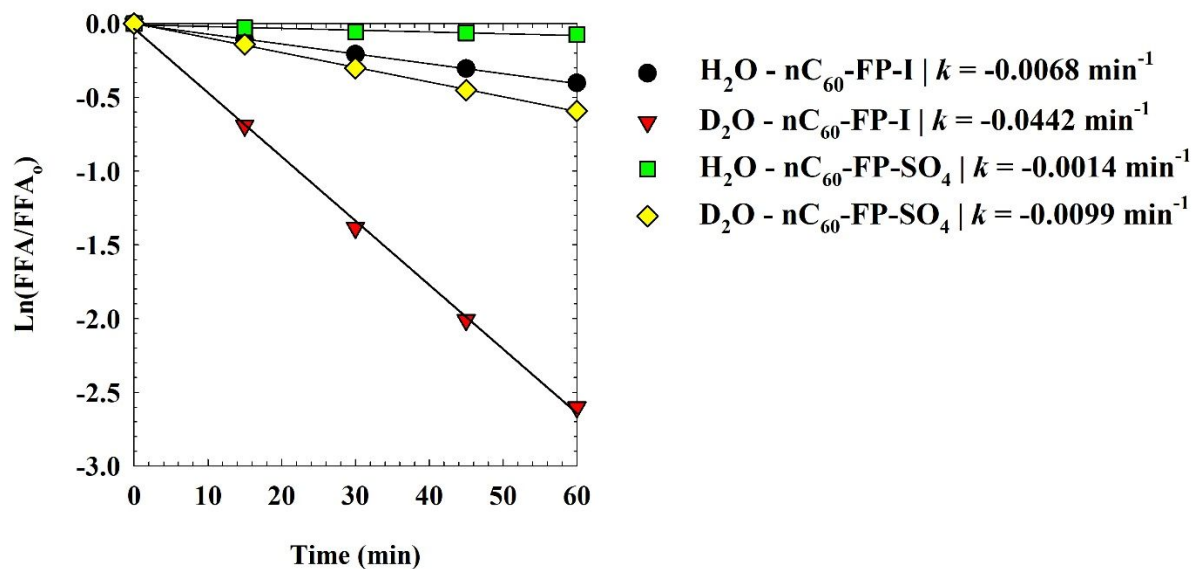

**Figure S8.** FFA photodegradation by 1.0 μM nC<sub>60</sub>-FP-I or nC<sub>60</sub>-FP-SO<sub>4</sub> in either DI water or 89% D<sub>2</sub>O. Lines represent linear regressions for the experiments, with corresponding slopes provided in the figure legend.
